# Supplementary material for: Changes in Cx43 and NaV1.5 Expression Precede the Occurrence of Substantial Fibrosis in Calcineurin-Induced Murine Cardiac Hypertrophy
Source: PubMed Central journal article supplement (PMC3909068; doi:10.1371/journal.pone.0087226), 2014-01-31
Supplement: pone.0087226.s005.pdf [file pone.0087226.s005.pdf]

**Table S1** – References of the Applied Biosystems assays used in this study.

| <b>Gene</b>       | <b>Assay ID</b> |
|-------------------|-----------------|
| <i>Gapdh</i>      | Mm99999915_g1   |
| <i>Scn5a</i>      | Mm00451971_m1   |
| <i>Gjal</i>       | Mm00439105_m1   |
| <i>Coll1a1</i>    | Mm00801666_g1   |
| <i>Coll1a2</i>    | Mm00483888_m1   |
| <i>Col3a1</i>     | Mm01254476_m1   |
| <i>Ctgf</i>       | Mm01192933_g1   |
| <i>Tgfb1</i>      | Mm01178820_m1   |
| <i>Timp1</i>      | Mm00441818_m1   |
| <b>miRNA</b>      | <b>Assay ID</b> |
| <i>U6 snRNA</i>   | 001973          |
| <i>hsa-miR-21</i> | 000397          |
